# Supplementary material for: Photobiomodulation in dental implant stability and post‐surgical healing and inflammation. A randomised double‐blind study
Source: PubMed Central journal article supplement — Clin Oral Implants Res. 2022 Dec 28;34(2):137–47. doi: 10.1111/clr.14026 (PMC10107821; doi:10.1111/clr.14026), 2022-12-28
Supplement: CLR-34-137-s001.pdf [file CLR-34-137-s001.pdf]

CONSORT Statement 2001 - Checklist   
 Items to include when reporting a randomized trial

Manuscript Title:

Submitting Author:

| <i>PAPER SECTION</i><br>And topic          | Item | Descriptor                                                                                                                                                                                                                                                                                                                                                                                  | Reported on<br>Page # |
|--------------------------------------------|------|---------------------------------------------------------------------------------------------------------------------------------------------------------------------------------------------------------------------------------------------------------------------------------------------------------------------------------------------------------------------------------------------|-----------------------|
| <i>TITLE &amp; ABSTRACT</i>                | 1    | <u>How participants were allocated to interventions</u> (e.g., "random allocation", "randomized", or "randomly assigned").                                                                                                                                                                                                                                                                  |                       |
| <i>INTRODUCTION</i><br>Background          | 2    | <u>Scientific background and explanation of rationale.</u>                                                                                                                                                                                                                                                                                                                                  |                       |
| <i>METHODS</i><br>Participants             | 3    | <u>Eligibility criteria for participants</u> and the <u>settings and locations where the data were collected.</u>                                                                                                                                                                                                                                                                           |                       |
| Interventions                              | 4    | <u>Precise details of the interventions intended for each group and how and when they were actually administered.</u>                                                                                                                                                                                                                                                                       |                       |
| Objectives                                 | 5    | <u>Specific objectives and hypotheses.</u>                                                                                                                                                                                                                                                                                                                                                  |                       |
| Outcomes                                   | 6    | <u>Clearly defined primary and secondary outcome measures</u> and, when applicable, any <u>methods used to enhance the quality of measurements</u> (e.g., multiple observations, training of assessors).                                                                                                                                                                                    |                       |
| Sample size                                | 7    | <u>How sample size was determined</u> and, when applicable, <u>explanation of any interim analyses and stopping rules.</u>                                                                                                                                                                                                                                                                  |                       |
| Randomization --<br>Sequence generation    | 8    | <u>Method used to generate the random allocation sequence, including details of any restrictions</u> (e.g., blocking, stratification)                                                                                                                                                                                                                                                       |                       |
| Randomization --<br>Allocation concealment | 9    | <u>Method used to implement the random allocation sequence</u> (e.g., numbered containers or central telephone), clarifying whether the sequence was concealed until interventions were assigned.                                                                                                                                                                                           |                       |
| Randomization --<br>Implementation         | 10   | <u>Who generated the allocation sequence, who enrolled participants, and who assigned participants to their groups.</u>                                                                                                                                                                                                                                                                     |                       |
| Blinding (masking)                         | 11   | <u>Whether or not participants, those administering the interventions, and those assessing the outcomes were blinded to group assignment.</u> If done, <u>how the success of blinding was evaluated.</u>                                                                                                                                                                                    |                       |
| Statistical methods                        | 12   | <u>Statistical methods used to compare groups for primary outcome(s); Methods for additional analyses</u> , such as subgroup analyses and adjusted analyses.                                                                                                                                                                                                                                |                       |
| <i>RESULTS</i><br>Participant flow         | 13   | <u>Flow of participants through each stage</u> (a diagram is strongly recommended; a sample flowchart is included). Specifically, for each group report the numbers of participants randomly assigned, receiving intended treatment, completing the study protocol, and analyzed for the primary outcome. <u>Describe protocol deviations from study as planned, together with reasons.</u> |                       |
| Recruitment                                | 14   | <u>Dates defining the periods of recruitment and follow-up.</u>                                                                                                                                                                                                                                                                                                                             |                       |
| Baseline data                              | 15   | <u>Baseline demographic and clinical characteristics of each group.</u>                                                                                                                                                                                                                                                                                                                     |                       |
| Numbers analyzed                           | 16   | <u>Number of participants (denominator) in each group included in each analysis and whether the analysis was by "intention-to-treat".</u> State the results in absolute numbers when feasible (e.g., 10/20, not 50%).                                                                                                                                                                       |                       |
| Outcomes and estimation                    | 17   | <u>For each primary and secondary outcome, a summary of results for each group, and the estimated effect size and its precision</u> (e.g., 95% confidence interval).                                                                                                                                                                                                                        |                       |
| Ancillary analyses                         | 18   | <u>Address multiplicity by reporting any other analyses performed</u> , including subgroup analyses and adjusted analyses, indicating those pre-specified and those exploratory.                                                                                                                                                                                                            |                       |
| Adverse events                             | 19   | <u>All important adverse events or side effects in each intervention group.</u>                                                                                                                                                                                                                                                                                                             |                       |
| <i>DISCUSSION</i><br>Interpretation        | 20   | <u>Interpretation of the results</u> , taking into account study hypotheses, sources of potential bias or imprecision and the dangers associated with multiplicity of analyses and outcomes.                                                                                                                                                                                                |                       |
| Generalizability                           | 21   | <u>Generalizability (external validity) of the trial findings.</u>                                                                                                                                                                                                                                                                                                                          |                       |
| Overall evidence                           | 22   | <u>General interpretation of the results in the context of current evidence.</u>                                                                                                                                                                                                                                                                                                            |                       |

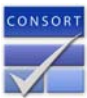

# CONSORT Statement 2001 Flow Diagram

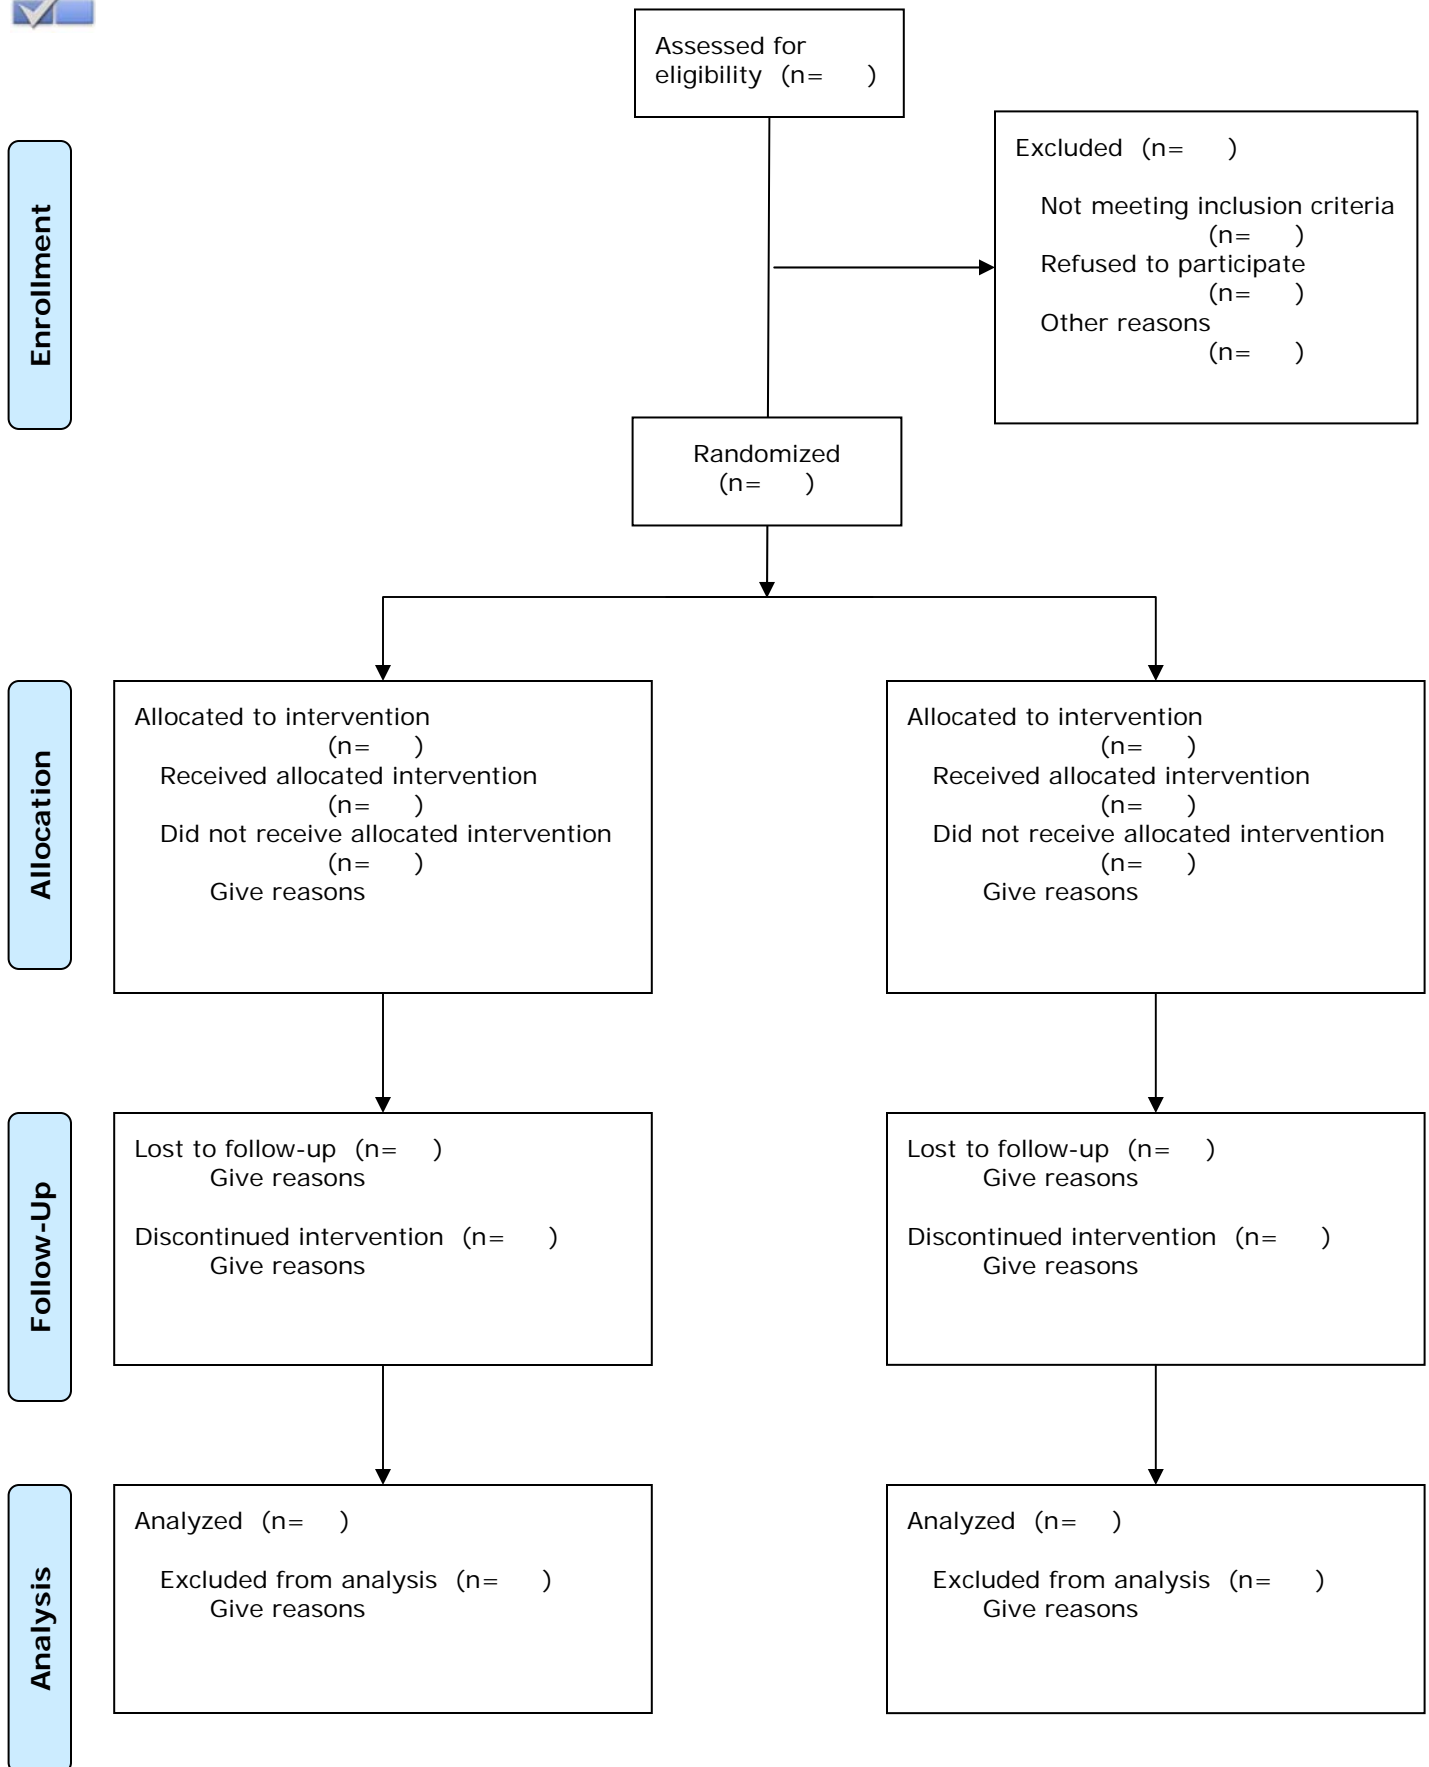

From Moher D, Schulz KF, Altman DG. The CONSORT statement: revised recommendations for improving the quality of reports of parallel-group randomised trials. Lancet 2001; 357(9263):1191-1194.

For more information, visit [www.consort-statement.org](http://www.consort-statement.org).
